# Supplementary material for: ZIF-8/Zn2GeO4 nanorods with an enhanced CO2 adsorption property in an aqueous medium for photocatalytic synthesis of liquid fuel
Source: Royal Society of Chemistry journal article supplement (doi:10.1039/c3ta12433a), 2013-01-01
Supplement: c3ta12433a.pdf [file c3ta12433a.pdf]

## Supplementary Information

# ZIF-8/Zn<sub>2</sub>GeO<sub>4</sub> Nanorods with Enhanced CO<sub>2</sub> Adsorption Property in Aqueous Medium for Photocatalytic Synthesis of Liquid Fuel †

†

Qi Liu,<sup>ab</sup> Ze-Xian Low,<sup>a</sup> Lunxi Li,<sup>a</sup> Amir Razmjou,<sup>a</sup> Kun Wang,<sup>a</sup>  
Jianfeng Yao,<sup>a</sup> Huanting Wang<sup>\*a</sup>

<sup>a</sup> Department of Chemical Engineering, Monash University, Clayton, VIC 3800,  
Australia. Fax: +61 3 9905 5686 ; Tel: +61 3 9905 3449  
E-mail: huanting.wang@monash.edu

<sup>b</sup> Anhui Polytechnic University, Wuhu 241000, P. R. China.

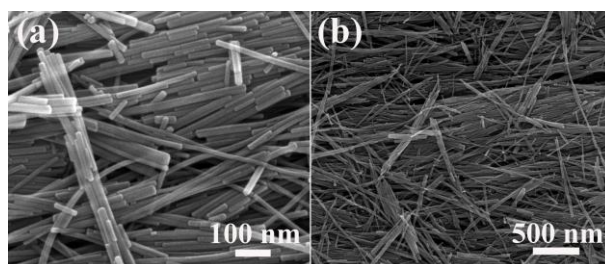

**Fig. S1** SEM images of Zn<sub>2</sub>GeO<sub>4</sub> nanorods at different magnifications.

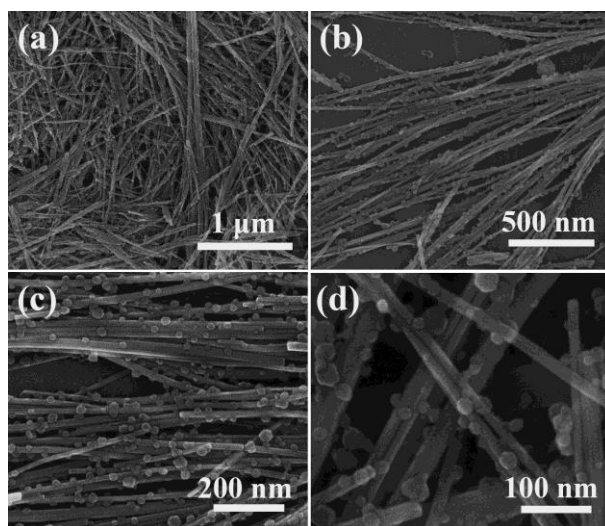

**Fig.S2** FE-SEM images of the Zn<sub>2</sub>GeO<sub>4</sub>/ZIF-8 hybrid nanorods at different magnifications.

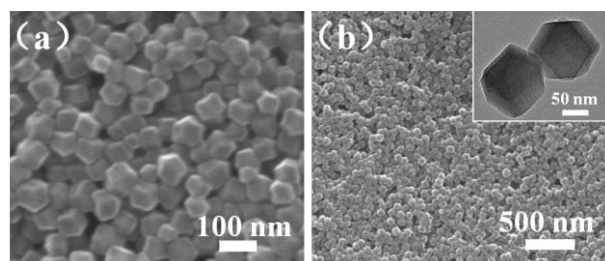

**Fig.S3** SEM images of ZIF-8 nanoparticles at different magnifications. The inset shows the TEM image of ZIF-8 nanoparticles.

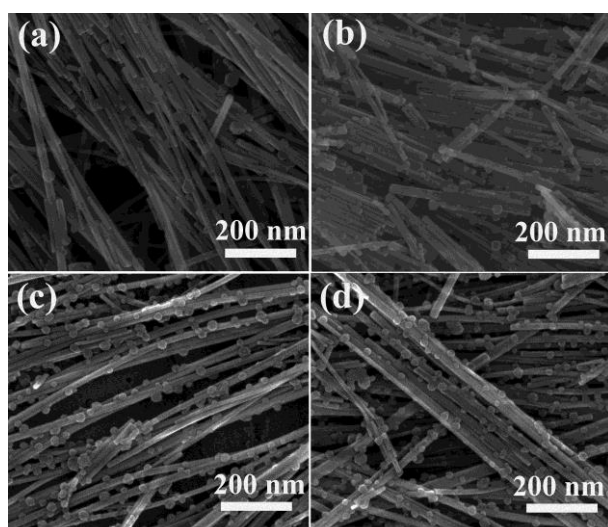

**Fig.S4** FE-SEM images of the Zn<sub>2</sub>GeO<sub>4</sub>/ZIF-8 hybrid nanorods prepared with different deposition time of ZIF-8: (a) 10 min, (b) 20 min, (c) 40 min, and (d) 60 min.

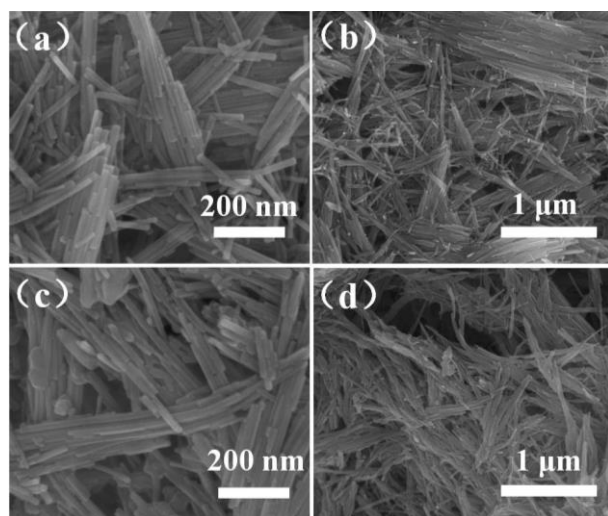

**Fig.S5** SEM images of Zn<sub>2</sub>GeO<sub>4</sub> nanorods prepared by fluoride ion (a) (b), and after in-situ growth of ZIF-8 (c)(d), indicating no ZIF-8 nanoparticles are formed.

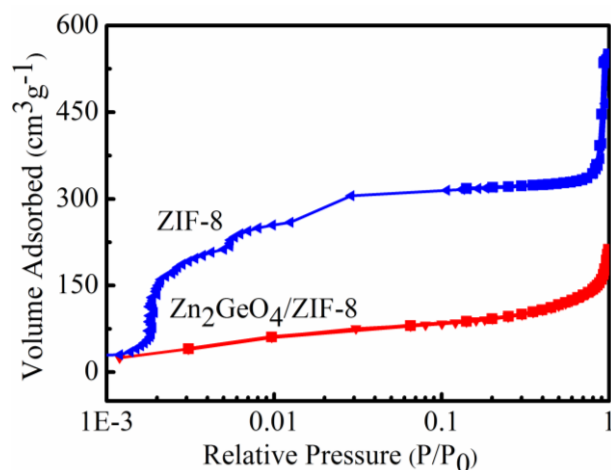

**Fig. S6** Semi-log plot for nitrogen adsorption isotherms of the ZIF-8 and ZIF-8/Zn<sub>2</sub>GeO<sub>4</sub> composite. The nitrogen adsorption on Zn<sub>2</sub>GeO<sub>4</sub>/ZIF-8 is more gradual than that on ZIF-8, especially at low relative pressures. This is because (1) the composite contains only 25% ZIF-8, and (2) ZIF-8 nanocrystals grown on Zn<sub>2</sub>GeO<sub>4</sub> are much smaller than the ZIF-8 crystals freely grown in the solution; much faster gas transport occurs in nanoparticles.

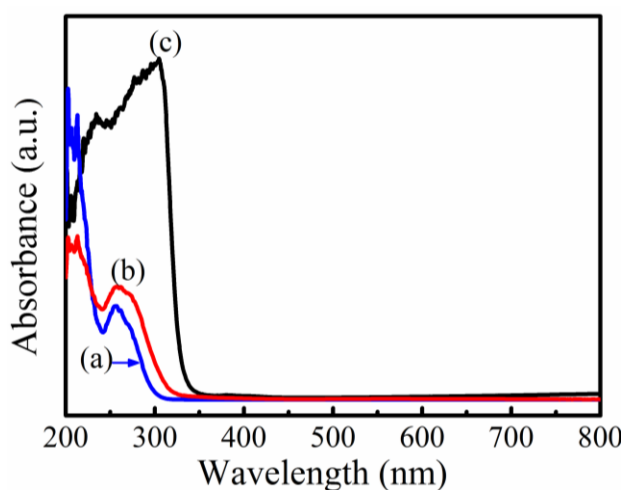

**Fig.S7** UV-vis absorption spectra of (a) Zn<sub>2</sub>GeO<sub>4</sub> nanorods, (b) Zn<sub>2</sub>GeO<sub>4</sub>/ZIF-8 hybrid nanorods, and (c) pure ZIF-8.

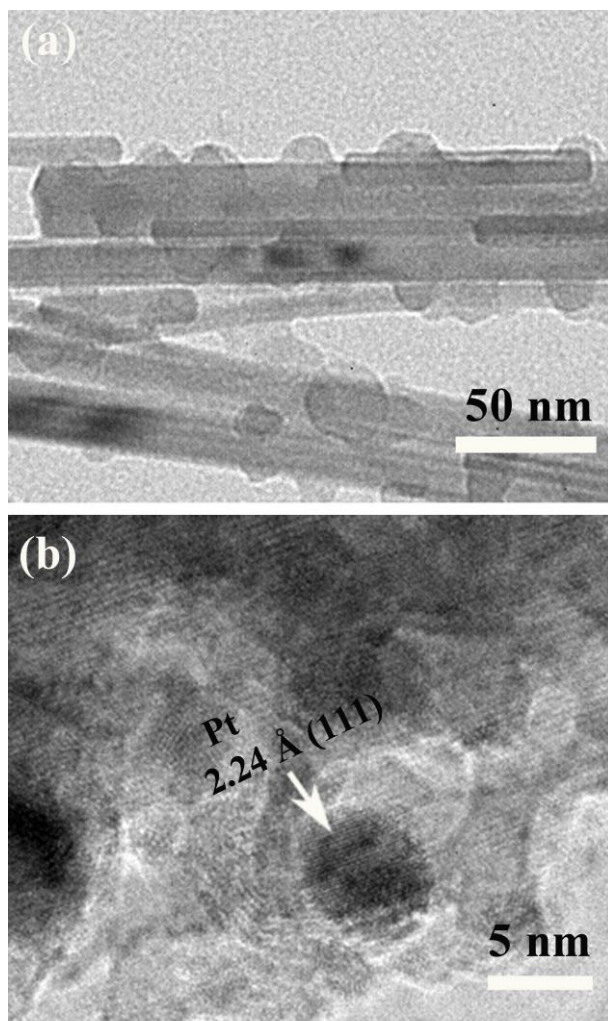

**Fig.S8** (a)TEM and (b)HRTEM images of 1 wt % Pt-loaded  $\text{Zn}_2\text{GeO}_4/\text{ZIF-8}$  hybrid nanocrods

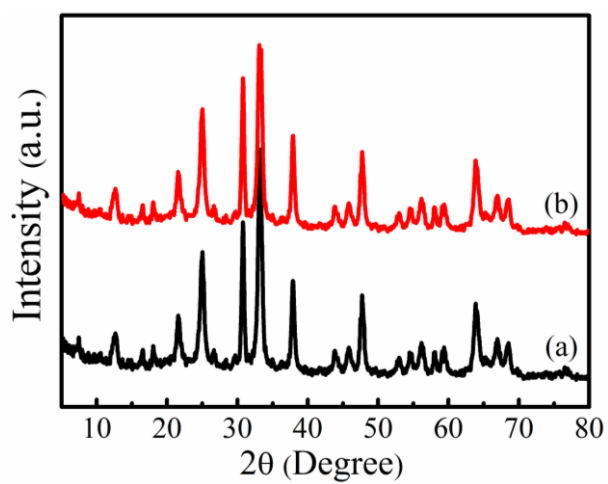

**Fig.S9** Powder X-ray diffraction patterns of Zn<sub>2</sub>GeO<sub>4</sub>/ZIF-8 hybrid nanorods (a) before and (b) after the photocatalytic reaction.
